# Supplementary material
Source: PubMed Central journal article supplement (PMC4031660)
Supplement: NIHMS576620-supplement-supplementary_data.pdf [file NIHMS576620-supplement-supplementary_data.pdf]

Supplementary Information

# Preclinical Evaluation of a Novel Monoclonal Antibody H6-11 for Prostate Cancer Imaging

Hongjun Jin,<sup>a</sup> Mai Xu,<sup>a</sup> Prashanth K. Padakanti,<sup>a</sup> Yongjian Liu,<sup>a</sup> Suzanne Lapi,<sup>a</sup> and Zhude

Tu<sup>\*a</sup>

<sup>a</sup>Department of Radiology, Washington University School of Medicine, 510 S. Kinghighway  
Blvd, St. Louis, MO 63110

\*Corresponding Author: Zhude Tu, Department of Radiology, Washington University School of  
Medicine, 510 S. Kingshighway blvd, St. Louis, MO, 63110, USA. E-mail: tuz@mir.wustl.edu;

Tel.: +1-314-362-8487; Fax: +1-314-262-8555

## Table of contents

|                                                                                                                                              |     |
|----------------------------------------------------------------------------------------------------------------------------------------------|-----|
| Table S1. Immunostaining of tissue array of prostate tumor with H6-11 .....                                                                  | S2  |
| Table S2. Summary of monoclonal antibody H6-11 reactivity with human prostate tumor tissues<br>.....                                         | S5  |
| Figure S1. SDS-PAGE and autoradiography of <sup>125</sup> I-H6-11.....                                                                       | S6  |
| Figure S2. <i>In vitro</i> autoradiography of <sup>125</sup> I-H6-11 with tumor tissue.....                                                  | S7  |
| Figure S3. Identification of H6-11 antigen epitopes via radioactivity binding measurements with<br>human prostate cancer cell line PC-3..... | S8  |
| Figure S4. TLC of Zr-89-H6-11 and SDS-PAGE autoradiography. ....                                                                             | S9  |
| Figure S5. Immunoreactivity of unmodified and p-SCN-Bz-DFO modified H6-11 <b>SError!</b><br><b>Bookmark not defined.</b>                     |     |
| Figure S6. Amino acid sequence for the CDRs region of H6-11 hybridoma cell line. ....                                                        | S11 |

**Table S1. Immunostaining of tissue array of prostate tumor with H6-11**

| No | Sex | Age | Organ    | Pathology diagnosis | Grade | Stage | TNM     | Type      | Staining Scores |
|----|-----|-----|----------|---------------------|-------|-------|---------|-----------|-----------------|
| 1  | M   | 72  | Prostate | Adenocarcinoma      | 1     | II    | T2N0M0  | Malignant | +               |
| 2  | M   | 64  | Prostate | Adenocarcinoma      | 1     | I     | T1N0M0  | Malignant | +++             |
| 3  | M   | 60  | Prostate | Adenocarcinoma      | 1     | IV    | T4N1M1c | Malignant | ++              |
| 4  | M   | 66  | Prostate | Adenocarcinoma      | 1     | IV    | T3N1M1c | Malignant | ++              |
| 5  | M   | 65  | Prostate | Adenocarcinoma      | 1     | II    | T2N0M0  | Malignant | ++              |
| 6  | M   | 75  | Prostate | Adenocarcinoma      | 1     | IV    | T2N1M1c | Malignant | ++              |
| 7  | M   | 71  | Prostate | Adenocarcinoma      | 2-3   | II    | T2N0M0  | Malignant | +++             |
| 8  | M   | 78  | Prostate | Adenocarcinoma      | 2     | IV    | T3N2M1  | Malignant | +++             |
| 9  | M   | 74  | Prostate | Adenocarcinoma      | 2     | IV    | T4N1M1c | Malignant | +               |
| 10 | M   | 69  | Prostate | Adenocarcinoma      | 2     | III   | T3N0M0  | Malignant | ++              |
| 11 | M   | 75  | Prostate | Adenocarcinoma      | 2     | IV    | T4N1M1  | Malignant | ++              |
| 12 | M   | 69  | Prostate | Adenocarcinoma      | 2     | II    | T2N0M0  | Malignant | +++             |
| 13 | M   | 73  | Prostate | Adenocarcinoma      | 2     | IV    | T3N1M1c | Malignant | +++             |
| 14 | M   | 56  | Prostate | Adenocarcinoma      | 2-3   | II    | T2N0M0  | Malignant | +++             |
| 15 | M   | 73  | Prostate | Adenocarcinoma      | 2     | II    | T2N0M0  | Malignant | +++             |
| 16 | M   | 70  | Prostate | Adenocarcinoma      | 2     | III   | T3N0M0  | Malignant | ++              |
| 17 | M   | 20  | Prostate | Adenocarcinoma      | 1-2   | III   | T3N0M0  | Malignant | ++              |
| 18 | M   | 61  | Prostate | Adenocarcinoma      | 1-2   | III   | T3N1M0  | Malignant | ++              |
| 19 | M   | 73  | Prostate | Adenocarcinoma      | 2     | III   | T3N0M0  | Malignant | +++             |

|    |   |    |          |                        |   |     |             |           |     |
|----|---|----|----------|------------------------|---|-----|-------------|-----------|-----|
|    |   |    |          |                        |   |     | 0           |           |     |
| 20 | M | 82 | Prostate | Adenocarcinoma         | 2 | II  | T2N0M0      | Malignant | ++  |
| 21 | M | 75 | Prostate | Adenocarcinoma         | 3 | IV  | T4N1M1      | Malignant | +   |
| 22 | M | 78 | Prostate | Adenocarcinoma         | 3 | IV  | T4N1M1b     | Malignant | +-  |
| 23 | M | 60 | Prostate | Adenocarcinoma         | 2 | IV  | T3N1M1b     | Malignant | +   |
| 24 | M | 73 | Prostate | Adenocarcinoma         | 2 | IV  | T3N1M1b     | Malignant | +++ |
| 25 | M | 62 | Prostate | Adenocarcinoma         | 2 | IV  | T3N1M1b     | Malignant | +   |
| 26 | M | 51 | Prostate | Adenocarcinoma         | 2 | II  | T2N0M0      | Malignant | ++  |
| 27 | M | 62 | Prostate | Adenocarcinoma         | 3 | II  | T2N0M0      | Malignant | +++ |
| 28 | M | 60 | Prostate | Adenocarcinoma         | 2 | IV  | T3N1M0      | Malignant | +++ |
| 29 | M | 68 | Prostate | Adenocarcinoma         | 2 | II  | T2N0M0      | Malignant | ++  |
| 30 | M | 64 | Prostate | Adenocarcinoma         | 3 | IV  | T3N0M1b     | Malignant | +   |
| 31 | M | 66 | Prostate | Adenocarcinoma         | 3 | II  | T2N0M0      | Malignant | ++  |
| 32 | M | 87 | Prostate | Adenocarcinoma         | 3 | II  | T2N0M0      | Malignant | +   |
| 33 | M | 81 | Prostate | Adenocarcinoma         | 3 | III | T3aNO<br>M0 | Malignant | +++ |
| 34 | M | 80 | Prostate | Adenocarcinoma         | 3 | IV  | T4N1M1c     | Malignant | ++  |
| 35 | M | 76 | Prostate | Adenocarcinoma         | 3 | IV  | T3N1M1b     | Malignant | +-  |
| 36 | M | 73 | Prostate | Adenocarcinoma         | 3 | IV  | T4N1M1c     | Malignant | +   |
| 37 | M | 63 | Prostate | Adenocarcinoma         | 3 | IV  | T2N1M1b     | Malignant | ++  |
| 38 | M | 67 | Prostate | Adenocarcinoma         | 3 | II  | T2N0M0      | Malignant | ++  |
| 39 | M | 65 | Prostate | Adenocarcinoma         | 3 | IV  | T2N1M1      | Malignant | ++  |
| 40 | M | 64 | Prostate | Adenocarcinoma         | 3 | II  | T2N0M0      | Malignant | ++  |
| 41 | M | 35 | Prostate | Normal prostate tissue | - | -   | -           | Normal*   | +-  |
| 42 | M | 43 | Prostate | Normal prostate tissue | - | -   | -           | Normal*   | +-  |

|    |   |    |          |                                             |   |   |        |           |     |
|----|---|----|----------|---------------------------------------------|---|---|--------|-----------|-----|
| 43 | M | 19 | Prostate | Normal prostate tissue                      | - | - | -      | Normal*   | +-  |
| 44 | M | 46 | Prostate | Normal prostate tissue                      | - | - | -      | Normal*   | +-  |
| 45 | M | 40 | Prostate | Normal prostate tissue                      | - | - | -      | Normal*   | +-  |
| 46 | M | 28 | Prostate | Normal prostate tissue                      | - | - | -      | Normal*   | +-  |
| 47 | M | 33 | Prostate | Normal prostate tissue                      | - | - | -      | Normal*   | +-  |
| 48 | M | 37 | Prostate | Normal prostate tissue                      | - | - | -      | Normal*   | +-  |
| -  | F | 55 | liver    | Hepatocellular liver cancer (tissue marker) | 3 |   | T3N0M0 | Malignant | +++ |

\*Epithelia from normal prostate glands are weak positive staining with mAb H6-11, but not from fibromuscular stroma.

**Table S2. Summary of monoclonal antibody H6-11 reactivity with human prostate tumor tissues**

| Scoring grade           | -         | ±         | +          | ++          | +++         | Total        |
|-------------------------|-----------|-----------|------------|-------------|-------------|--------------|
| Prostate tumor Case (%) | 0<br>(0%) | 2<br>(5%) | 8<br>(20%) | 18<br>(45%) | 12<br>(30%) | 40<br>(100%) |
|                         |           |           | 38 (95%)   |             |             |              |

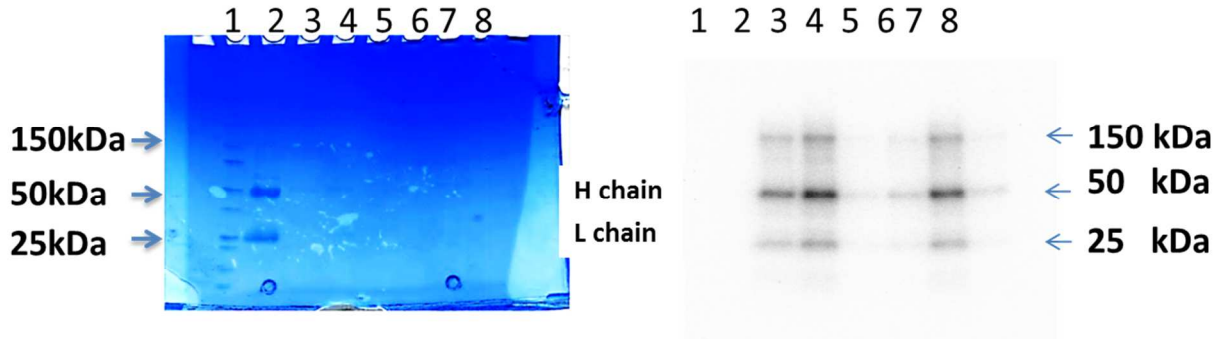

**Figure S1. SDS-PAGE (left) and autoradiography (right) of  $^{125}\text{I}$ -H6-11.**

Lane1: standard protein marker; Lane 2: unlabeled IgG; Lanes 3-5:  $^{125}\text{I}$  labeled H6-11 sample1 elution 1-3; Lane 6-8:  $^{125}\text{I}$  labeled H6-11 sample2 elution 1-3. Autoradiography from  $^{125}\text{I}$  labeled H6-11, two samples, both showed full length IgG (150 KDa), and heavy chain (50 KDa) and light chain (25 KDa) bands indicating successful iodination.

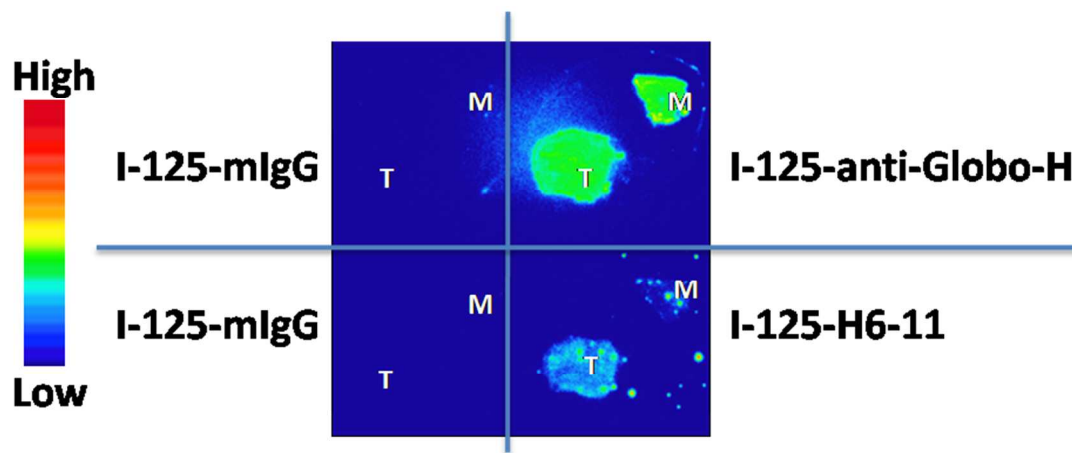

**Figure S2. *In vitro* autoradiography of  $^{125}\text{I}$ -H6-11 with tumor tissue.**

1  $\mu\text{Ci}/\text{mL}$   $^{125}\text{I}$  labeled mouse IgG, H6-11 and anti-Globo-H antibodies were incubated with tissue slides collected from PC-3 implanted tumor (T) or muscle (M). After incubation and washing the slides three times with PBS-TW-20, the slides were directly placed in the FLA-7000 imager to process for autoradiography.  $^{125}\text{I}$ -mIgG has no any detectable interaction with either tumor or muscle tissues.  $^{125}\text{I}$ -Globo-H reacted with both the tumor and muscle tissues evenly.  $^{125}\text{I}$ -H6-11 reacted strongly to tumor collected from PC-3 xenograft mouse.

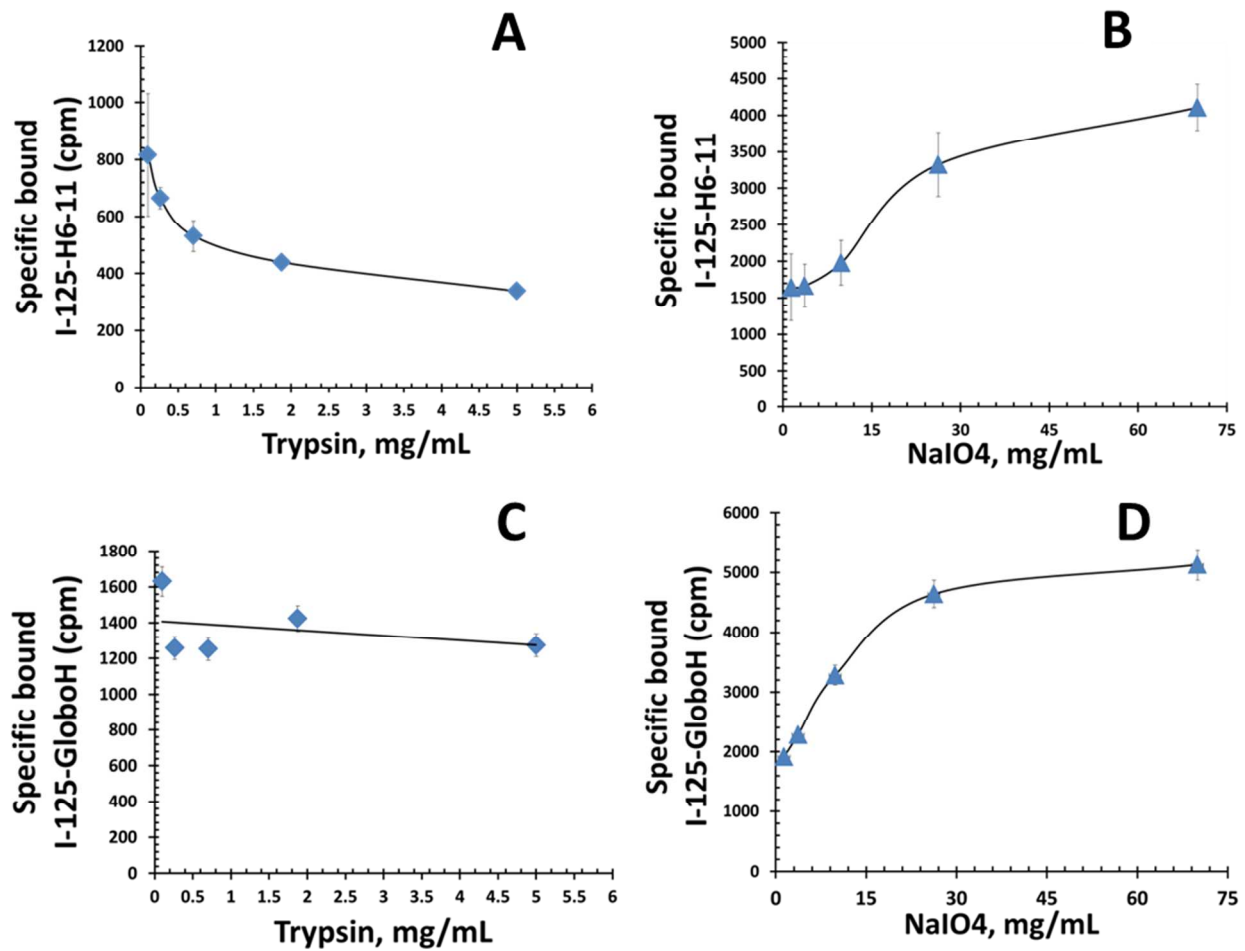

**Figure S3. Identification of H6-11 antigen epitopes via radioactivity binding measurements with human cancer cells.**

**Panel A:** For PC-3 cells, increasing the concentration of trypsin decreased the  $^{125}\text{I}$ -H6-11 binding. **Panel B:** For PC-3 cells, increasing the concentration of periodate increased the  $^{125}\text{I}$ -H6-11 binding. **Panel C:** For MCF-7, increasing the concentration of trypsin barely changed the  $^{125}\text{I}$ -anti-Globo-H binding. **Panel D:** For MCF-7, increasing the concentration of periodate increased the  $^{125}\text{I}$ -anti-Globo-H binding.



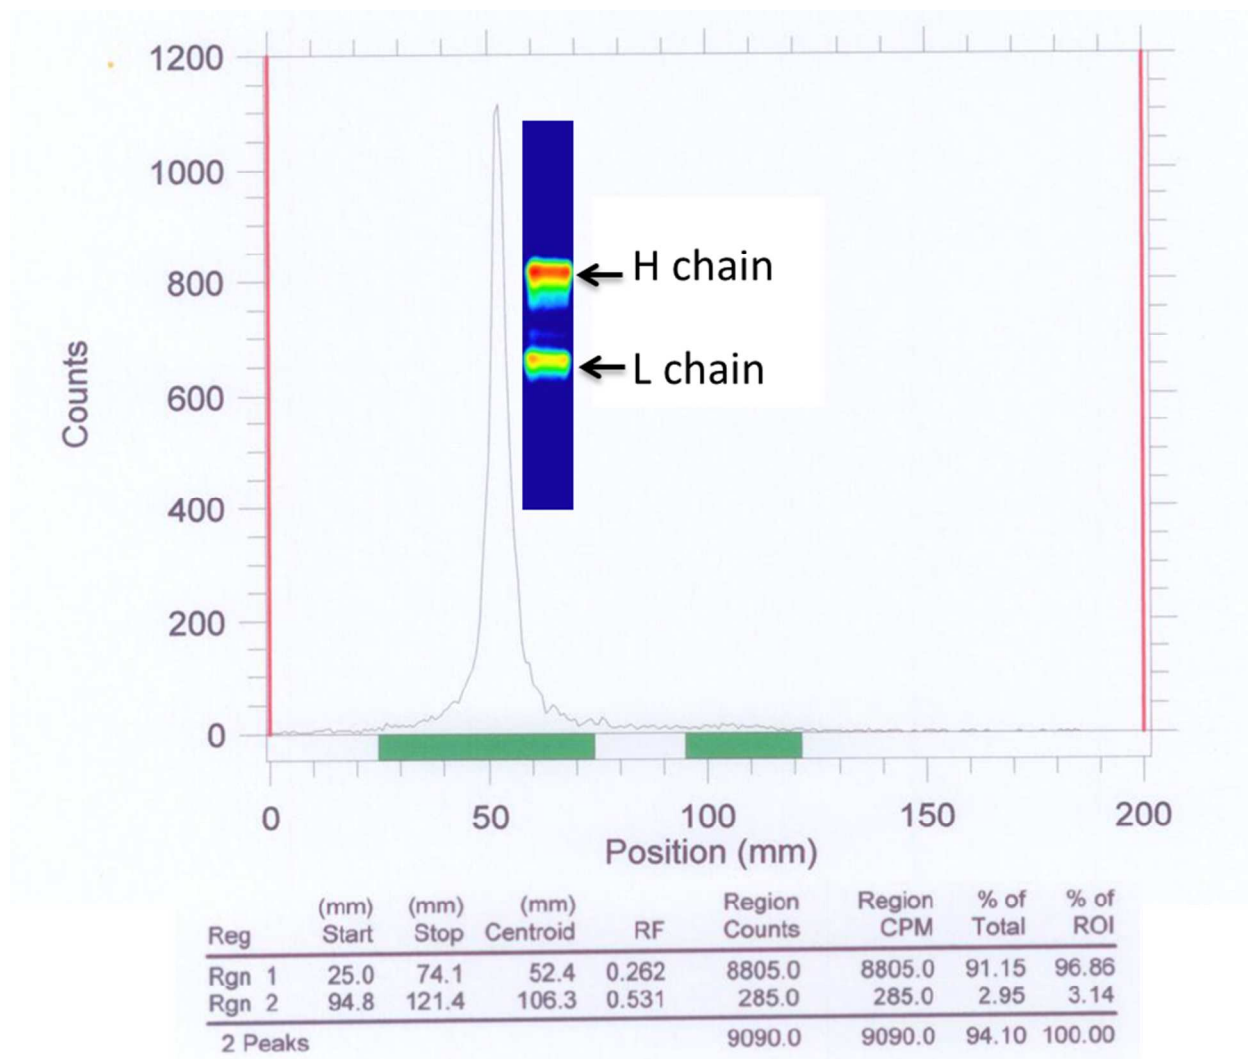

**Figure S4. TLC of  $^{89}\text{Zr}$ -H6-11 and SDS-PAGE autoradiography.**

The  $^{89}\text{Zr}$  labeled H6-11 after purification on the Pierce Zeba desalting column was quantified by TLC. The major peak (96.86%) was  $^{89}\text{Zr}$ -H6-11 at position 50 mm (baseline), while the free  $^{89}\text{Zr}$  peak (3.14%) is at 100 mm position. The inserted image is from the SDS-PAGE and autoradiography of the major peak. Both the heavy and light chains are radiolabeled.

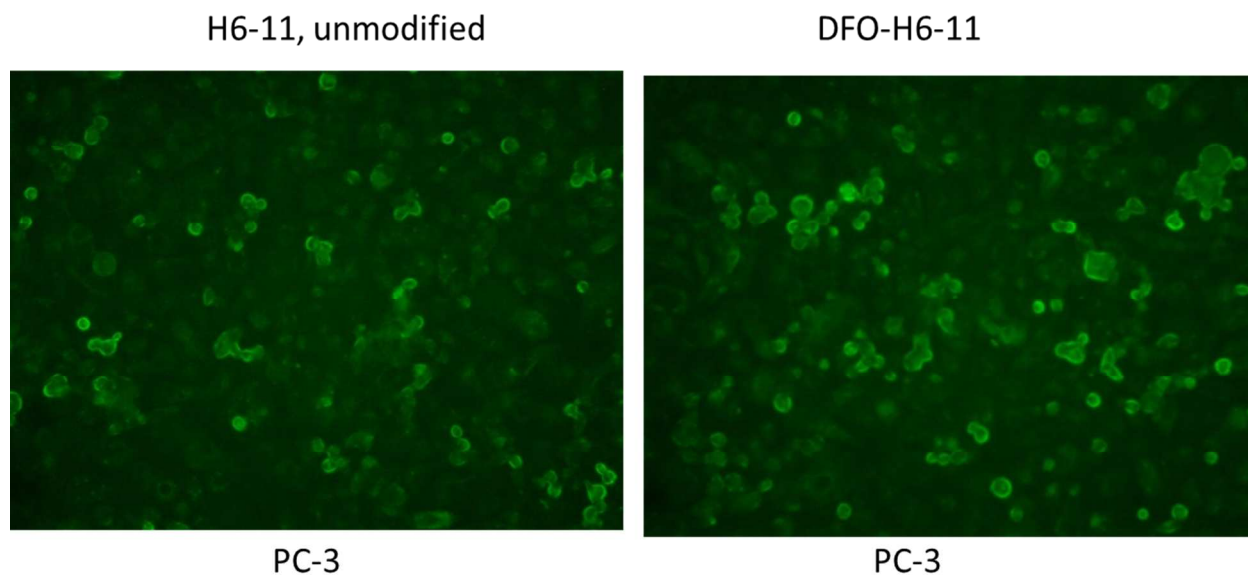

**Figure S5. Immunofluorescence of unmodified H6-11 and *p*-SCN-Bz-DFO modified H6-11.**

PC-3 cell was immunofluorescence stained with 5  $\mu\text{g}/\text{mL}$  H6-11 (left) and *p*-SCN-Bz-DFO modified H6-11 (abridge: DFO-H6-11) (right). No significant immunoreactivity changes were observed between *p*-SCN-Bz-DFO modified H6-11 and unmodified H6-11.

**Heavy chain: Amino acids sequence (135 AA)**

**Leader sequence-FR1-CDR1-FR2-CDR2-FR3-CDR3-FR4**  
**MAVWVWTLFLMAAAQSIQAQIQLVQSGPELKKPGETVKISCKASGYTF**  
**TDYSMHVWKQAPGKGLKWMGWINTETGEPTYADDFKGRFAFSLETS**  
**STAYLQINNLIKNETATYFCARSRRYDDYWGQGTTLVSS**

**Light chain: Amino acids sequence (133 AA)**

**Leader sequence-FR1-CDR1-FR2-CDR2-FR3-CDR3-FR4**  
**MDSQAQVLMLLLLWVSGTCGDIVMSQSPSSLAVSVGEKVTMSCKSSQSL**  
**LYSSNQKNYLAWYQQKPGQSPKLLIYWASTRESGVPDRFTGSGSGTDFTL**  
**TISSVKAEDLAVYYCQQYYSYPYTFGGGTKLEIK**

**Figure S6. Amino acid sequence for the CDRs region of H6-11 hybridoma cell line.**

The amino acid sequences are translated from cDNA sequencings. The predicted binding sites (including heavy chain and light chain) from CDRs were blue coded.
